# Supplementary material for: A Unified Framework Integrating Parent-of-Origin Effects for Association Study
Source: PLoS One. 2013 Aug 26;8(8):e72208. doi: 10.1371/journal.pone.0072208 (PMC3753359; doi:10.1371/journal.pone.0072208)
Supplement: Text S5 — Test Statistics for Full and Reduced One-Locus Models. (DOCX) [file pone.0072208.s009.docx]

**Text S5: Test Statistics for Full and Reduced One-Locus Models**

The Wald test statistic is , where

The rows of matrixrepresent the corresponding genotype for individual . And .

, and

We recall that,, .

**For NOIA statistical model with no dominance component modeled,**

Then

**For NOIA statistical model with dominance component,**

Then we got the test statistic for the NOIA one-locus full model as follows:

.

**For usual functional model with no dominance component modeled,**

It results in the same test statistic as the NOIA model for the additive effect estimating.

**For usual functional model with dominance component modeled,**

From the second row of the matrix, we observe that the test statistic for the additive effect is different with those of the previous three models. And the test statistic z is usually smaller.
